# Supplementary material for: Photon upconversion of Nd3+–Yb3+–Tb3+ doped core–shell–shell–shell nanoparticles
Source: Royal Society of Chemistry journal article supplement (doi:10.1039/d4ce00373j), 2024-01-01
Supplement: d4ce00373j1.pdf [file d4ce00373j1.pdf]

## Supporting Information

### Photon upconversion of Nd<sup>3+</sup>-Yb<sup>3+</sup>-Tb<sup>3+</sup> doped core-shell-shell-shell nanoparticles

Wenfei Xun,<sup>a</sup> Zhipeng Meng,<sup>\*b</sup> Chuwei Xie<sup>c</sup> and Suli Wu<sup>\*a</sup>

*a. State Key Laboratory of Fine Chemicals, Dalian University of Technology, 2# Linggong Road, Dalian 116024, P.R. China.*

*b. School of Chemistry and Chemical Engineering, Shandong University of Technology, Zibo 255049, P.R. China*

*c. School of Chemistry, Dalian University of Technology, 2# Linggong Road, Dalian 116024, P.R. China.*

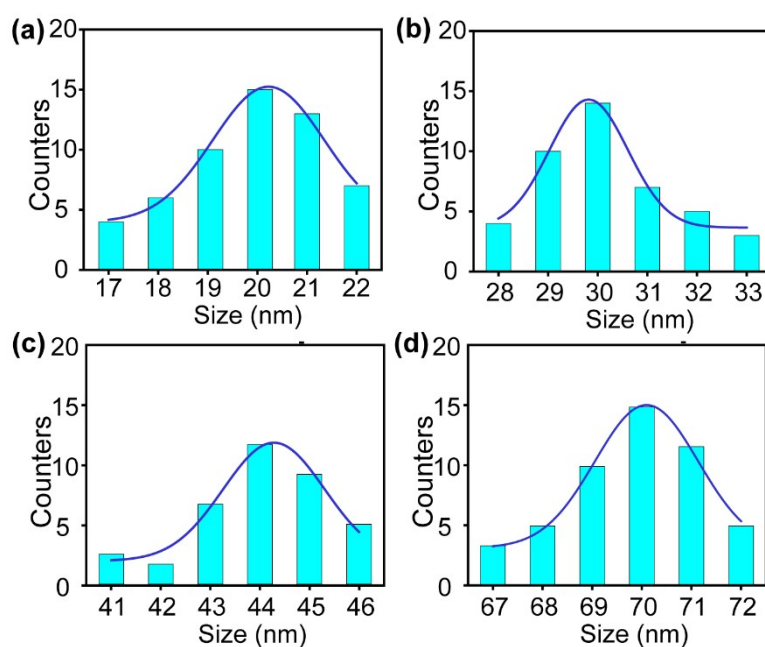

**Fig. S1** Size distribution of core, CS, CSS, and CSSS nanoparticles.

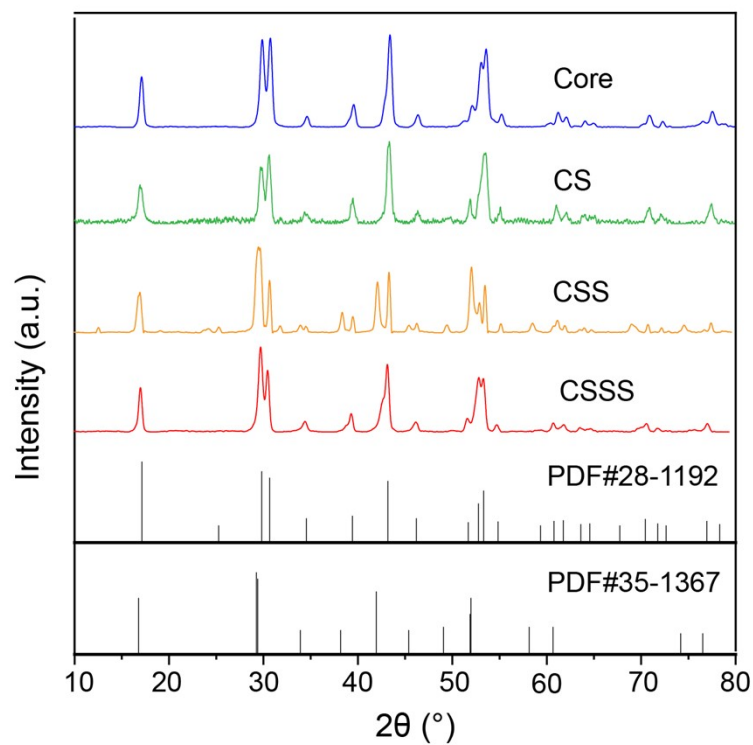

**Fig. S2** X-ray diffraction (XRD) patterns of core, core-shell (CS), core-shell-shell (CSS), and core-shell-shell-shell (CSSS) nanoparticles.

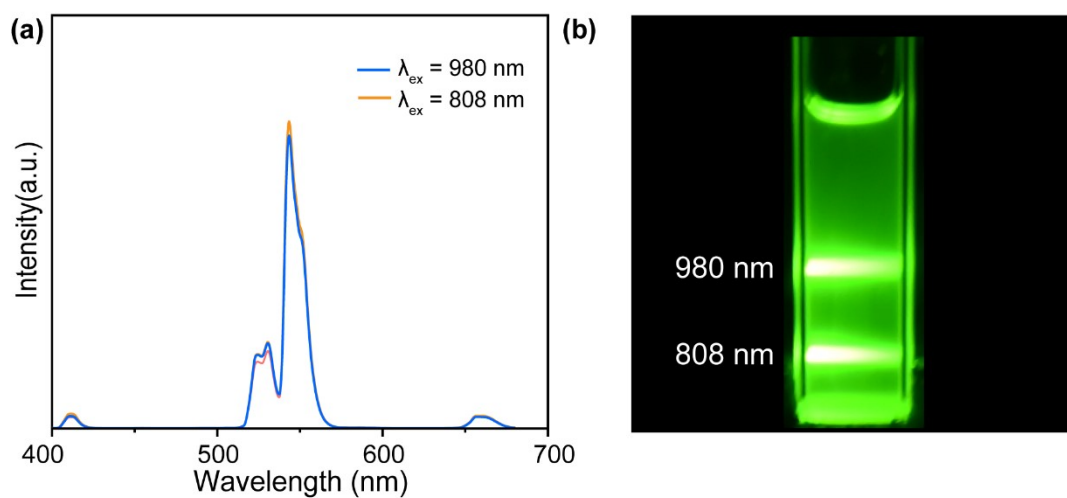

**Fig. S3** luminescence spectrum of CSSS nanoparticles excited under 980 nm and 808 nm. (b) Photograph of CSSS nanoparticles excited under 980 nm and 808 nm.

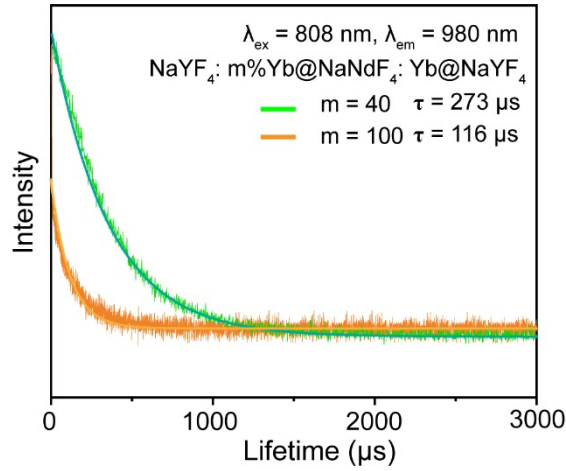

**Fig. S4** Upconversion decay curves of  $\text{NaYF}_4: m\% \text{Yb@NaNdF}_4: \text{Yb@NaYF}_4$  NPs

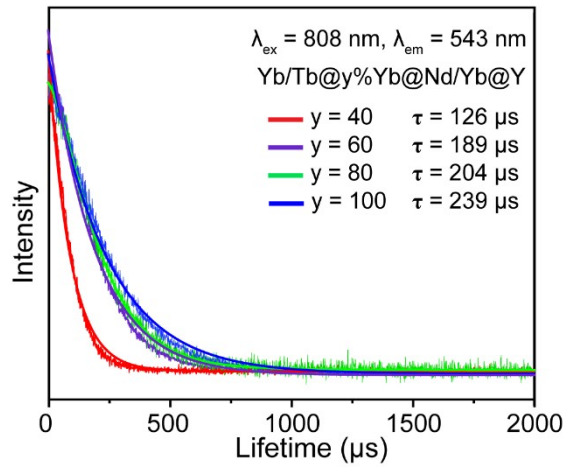

**Fig. S5** Upconversion decay curves of CSSS NPs

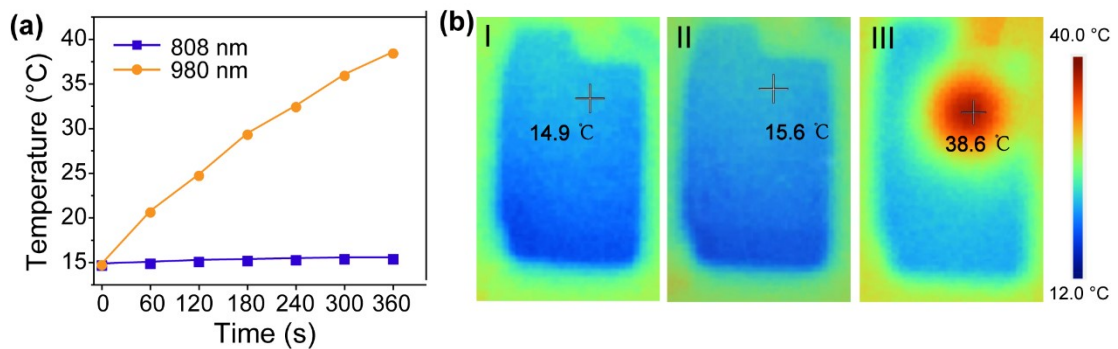

**Fig. S6** (a) Time-resolved temperature curves of hydrogel heated by 808 nm and 980 nm laser irradiation. (b) Temperature-distribution image of hydrogel recorded after 360 s laser (I: natural state; II: 808 nm; III: 980 nm).
